# Supplementary material for: In Silico Analysis Revealed Five Novel High-Risk Single-Nucleotide Polymorphisms (rs200384291, rs201163886, rs193141883, rs201139487, and rs201723157) in ELANE Gene Causing Autosomal Dominant Severe Congenital Neutropenia 1 and Cyclic Hematopoiesis
Source: ScientificWorldJournal. 2022 May 6;2022:3356835. doi: 10.1155/2022/3356835 (PMC9106522; doi:10.1155/2022/3356835)
Supplement: Supplementary Materials — Supplementary File 1: Table 1: twenty-one SIFT deleterious nsSNPs predictions through different in silico software. Table 2: total 301 ELANE missense SNPs SIFT prediction results. Supplementary File 2: Figure 1: overall significance of the prediction tools used in the study (the significance of the different prediction tools used in the study). Supplementary File 3: the effects of 50 highly risk pathogenic nsSNPs of ELANE gene on protein stability predicted by I-Mutant and MUpro (the effect of deleterious nsSNPs by two tools on protein stability and also the nsSNPs multiple allele frequency). Supplementary File 4: pathogenic nsSNPs analysis through HOPE Project. Supplementary File 5: Table 1: prediction of phosphorylation sites by NetPhos 3.1. Table 2: NetOGlyc 4.0 results for ELANE (wild type and final selected mutants). Supplementary File 6: Ramachandran plot and Chi1-chi2 plots of wild-type and mutant models. [file 3356835.f1.zip › 3356835.f1/S1 (1).txt]

Table1 21 SIFT prdicated nsSNPs confirmation thorugh different inslico tools
RS	SS	Sift	PolyPhn	Proven	PHD	Panther	SNP-GO	SNAP2	P-Mut	FATHMAN	FATHMAN-MKK	Mutation tastr	Muation accsor	MTaSVM	Mtal R	PON-P2	LRT	Vst	CADD	DANN	M-CAP
rs201163886	R34W	0.002	1	-6.525	"0.598
"	0.857	0.732	47	 N0.3	" 
-2.53"	 0.077 (T)	0.837 (P)	1.51 low	0.084	0.714	0.823	0.006 (U)	0.998	26.1	0.998	0.74
rs28931611	C71R	0	1	-11.219	0.933	0.982	0.85	77	D0.71		" 
0.81731"	1 (D)	4.22 high			0.959					
rs137854449	V101M	0.005	0.964	(T)-2.292	0.588	"(N)0.241
"	(N)0.306	49	D0.9	-3.69	(T)0.014	1 (P)	2.6 m	0.509	0.904	U0.74	0.900 (U)	0.754	22.3	0.994	0.917
rs137854449 	V101L	0.026	(B)0.001	(N)-1.939	"(D)0.532
"	(D)0.502	"(N)0.314

"	59	D0.55	-3.61	0.079 (T)	P 0.999	1.795 lo	0.005	0.758	U0.366	0.900 (U)	(T)0.388	11.97	0.819	0.91
rs137854448	P139L	0	1	-8.79	0.733	0.888	0.855	59	D0.85			D 1	2.72 m			0.87					
rs199558534	R143C	0.048	1	-2.652	0.528	0.588	(N)0.346	43	N0.33	-2.48	0.035 (T)	1:00 PM	low1.775	 -0.262 (T)	0.67	U0.266	0.126 (U)	0.611	25.3	0.998	0.595
rs57246956	C151Y	0	1	-10.408	0.939	0.988	0.936	82	D0.9			D0.995	2.745 m			0.966					
rs201788817	A166T	0.33	0.976	(N)-0.865	(N)0.336	(N)0.167	(N)0.105	-51	N0.2	-2.4	 0.018 (T)	1: PM	0.655 n	(T)-0.411	0.487 (T)	U0.735	(U)0.21	0.646	20.5	0.997	0.316
rs199891906	A166V	0.23	(P)0.582	(N)-1.883	(N)0.5	(N)0.219	(N)0.128	23	N0.28	-2.44	 0.357 (T)	1:00 PM	1.08 l	T)-0.328	(T)0.444	 U0.562	0.210 (U)	0.631	24.1	0.996	0.373
rs193141883	T175M	0.008	1	-4.757	(N)0.274	0.883	(D)0.521	2	D0.7			D0.999	1.98 m			0.89					
rs200449787	R182H	0.015	1	-3.108	(N)0.281	0.73	(N)0.421	2	N0.22	 -3.11 (D)	0.047 (T)	1.00 P	1.555 l	(T)-0.003	0.754	U 0.550	0.056 (U)	0.582	23.7	0.996	0.661
rs367663236	V190M	0.047	1	(T)-1.958	(N)0.114	0.774	(N)0.253	-9	N0.36	(D)-2.41  	0.796	0.995	1.675 l	0.043	0.748	0.904	0.389 (U)	0.638	22.8	0.996	0.52
rs201723157	R193W	0.006	1	-5.694	0.566	0.909	0.834	55	D0.63			0.997	1.775 l			0.954					
rs201139487	G203S	0	1	-5.395	0.898	0.955	0.908	77	D0.89			0.982	3.865 h			0.938					
rs137854446	L206F	0	1	-3.469	0.8	0.638	0.672	24	N0.38	-2.41	 0.796 (D)	0.999	2.55 m	0.043	0.748	 U 0.818	0.389 (U)	0.638	22.8	0.996	0.52
rs201664319	N209K	0.03	0.983	-2.853	(N)0.451	(N)0.309	"(N)0.356
"	-53	N0.27	-2.33	(T)0.117	0.999	1.105 l	-0.028	0.57	U 0.499	0.326 (U)	0.534	23.1	0.991	0.579
rs140880838	G210R	0.019	1	-5.543	0.789	(N)0.264	0.509	76	N0.47	-2.44	0.773 (D)	(P)0.744	1.173 l	0.134	0.719	0.864	(U)0.266	0.69	25	0.997	0.66
rs137854451	G214R	0.002	1	-6.198	0.924	0.98	0.846	94	D0.9			1.873	4.2 h			0.928					
rs200384291	F218L	0.011	0.998	-4.818	0.769	0.531	0.767	76	D0.84			P0.999	2.195 m			 U0.672					
rs17216670	P262S	0	(B)0.028	(T)-0.692	(N)0.188	NO	"(N)0.044
"	52	N0.12		0.089 (T)	P0.999	 l1.32	(T)-0.656 	(T)0.370	0.096 N	NO	0.582	4.349 (T)	0.763 (T)	0.125
rs138211132	P262L	0	(B)0.005	(T)-1.186	(N)0.17	NO	(N)0.037	74	N0.42	-2.52	0.034 (T)	1 (P)	 l1.32	(T)-0.760 	0.282 (T)	0.544 U	NO		8.214 (T)	 0.767(T)	0

Threshold:  Mutation Taster: <0.5 CADD: > 15   MetaLR: > 0.5   M-Cap: > 0.025   PANTHER: probably damaging time > 450my possibly damaging" (450my > time > 200my, "probably benign" (time < 200my). VEST3: > 0.5 LRT: >0.001 PROVEAN: > -2.667 FATHMM-MKK/: < 0.5 PhDSNP: >0.5 SNP-GO: >0.5 SNAP2: −100 (fully neutral) +100 (strong effect)   DANN: >0.5   Mutation Assessor: > 0.65 (‐5.545 to 5.975 (higher score ‐> more damaging)) FATHMM: > 0.453, PON-P2: >0.5  

Table 2: SIFT results of 301 missense of Elane
SNP	ORGANISM_BUILD	CHR	COORDINATE	REF_ALLELE	ALT_ALLELE	AMINO_ACID_CHANGE	GENE_NAME	GENE_ID	TRANSCRIPT_ID	PROTEIN_ID	REGION	SIFT_SCORE	SIFT_MEDIAN	NO_OF_SEQS_AT_POSITION	SIFT_PREDICTION	AVG_ALLELE_FREQ	EAS_ALLELE_FREQ	AMR_ALLELE_FREQ	AFR_ALLELE_FREQ	EUR_ALLELE_FREQ	SAS_ALLELE_FREQ
rs17216656	Homo_sapiens/GRCh37.74	19	856015	G	A	V219I	ELANE	ENSG00000197561	ENST00000263621	ENSP00000263621	CDS	0.977	2.63	36	TOLERATED	0.01	0.004	0.003	0.033	0	0
rs17216656	Homo_sapiens/GRCh37.74	19	856015	G	A	V219I	ELANE	ENSG00000197561	ENST00000590230	ENSP00000466090	CDS	0.977	2.63	36	TOLERATED	0.01	0.004	0.003	0.033	0	0
rs17216663	Homo_sapiens/GRCh37.74	19	856130	C	T	P257L	ELANE	ENSG00000197561	ENST00000263621	ENSP00000263621	CDS	0.197	3.28	12	TOLERATED	0.005	0	0.011	0	0.01	0.008
rs17216663	Homo_sapiens/GRCh37.74	19	856130	C	T	P257L	ELANE	ENSG00000197561	ENST00000590230	ENSP00000466090	CDS	0.197	3.28	12	TOLERATED	0.005	0	0.011	0	0.01	0.008
rs17216670	Homo_sapiens/GRCh37.74	19	856145	C	T	P262L	ELANE	ENSG00000197561	ENST00000263621	ENSP00000263621	CDS	0	3.35	8	DELETERIOUS	0.005	0	0.003	0.019	0	0
rs17216670	Homo_sapiens/GRCh37.74	19	856145	C	T	P262L	ELANE	ENSG00000197561	ENST00000590230	ENSP00000466090	CDS	0	3.35	8	DELETERIOUS	0.005	0	0.003	0.019	0	0
rs28931611	Homo_sapiens/GRCh37.74	19	853019	T	C	C71R	ELANE	ENSG00000197561	ENST00000263621	ENSP00000263621	CDS	0	2.57	40	DELETERIOUS						
rs28931611	Homo_sapiens/GRCh37.74	19	853019	T	C	C71R	ELANE	ENSG00000197561	ENST00000590230	ENSP00000466090	CDS	0	2.57	40	DELETERIOUS						
rs57246956	Homo_sapiens/GRCh37.74	19	855649	G	A	C151Y	ELANE	ENSG00000197561	ENST00000263621	ENSP00000263621	CDS	0	2.57	42	DELETERIOUS						
rs57246956	Homo_sapiens/GRCh37.74	19	855649	G	A	C151Y	ELANE	ENSG00000197561	ENST00000590230	ENSP00000466090	CDS	0	2.57	42	DELETERIOUS						
rs112990855	Homo_sapiens/GRCh37.74	19	855687	G	A	G164R	ELANE	ENSG00000197561	ENST00000263621	ENSP00000263621	CDS	0.589	2.63	41	TOLERATED						
rs112990855	Homo_sapiens/GRCh37.74	19	855687	G	A	G164R	ELANE	ENSG00000197561	ENST00000590230	ENSP00000466090	CDS	0.589	2.63	41	TOLERATED						
rs112990855	Homo_sapiens/GRCh37.74	19	855687	G	C	G164R	ELANE	ENSG00000197561	ENST00000263621	ENSP00000263621	CDS	0.589	2.63	41	TOLERATED						
rs112990855	Homo_sapiens/GRCh37.74	19	855687	G	C	G164R	ELANE	ENSG00000197561	ENST00000590230	ENSP00000466090	CDS	0.589	2.63	41	TOLERATED						
rs137854445	Homo_sapiens/GRCh37.74	19	856019	G	A	R220Q	ELANE	ENSG00000197561	ENST00000263621	ENSP00000263621	CDS	0.526	2.63	36	TOLERATED						
rs137854445	Homo_sapiens/GRCh37.74	19	856019	G	A	R220Q	ELANE	ENSG00000197561	ENST00000590230	ENSP00000466090	CDS	0.526	2.63	36	TOLERATED						
rs137854445	Homo_sapiens/GRCh37.74	19	856019	G	C	R220P	ELANE	ENSG00000197561	ENST00000263621	ENSP00000263621	CDS	0.356	2.63	36	TOLERATED						
rs137854445	Homo_sapiens/GRCh37.74	19	856019	G	C	R220P	ELANE	ENSG00000197561	ENST00000590230	ENSP00000466090	CDS	0.356	2.63	36	TOLERATED						
rs137854446	Homo_sapiens/GRCh37.74	19	855978	G	T	L206F	ELANE	ENSG00000197561	ENST00000263621	ENSP00000263621	CDS	0	2.6	37	DELETERIOUS						
rs137854446	Homo_sapiens/GRCh37.74	19	855978	G	T	L206F	ELANE	ENSG00000197561	ENST00000590230	ENSP00000466090	CDS	0	2.6	37	DELETERIOUS						
rs137854447	Homo_sapiens/GRCh37.74	19	852990	C	T	A61V	ELANE	ENSG00000197561	ENST00000263621	ENSP00000263621	CDS	0.085	2.57	38	TOLERATED						
rs137854447	Homo_sapiens/GRCh37.74	19	852990	C	T	A61V	ELANE	ENSG00000197561	ENST00000590230	ENSP00000466090	CDS	0.085	2.57	38	TOLERATED						
rs137854448	Homo_sapiens/GRCh37.74	19	855613	C	T	P139L	ELANE	ENSG00000197561	ENST00000263621	ENSP00000263621	CDS	0	2.56	41	DELETERIOUS						
rs137854448	Homo_sapiens/GRCh37.74	19	855613	C	T	P139L	ELANE	ENSG00000197561	ENST00000590230	ENSP00000466090	CDS	0	2.56	41	DELETERIOUS						
rs137854449	Homo_sapiens/GRCh37.74	19	853338	G	A	V101M	ELANE	ENSG00000197561	ENST00000263621	ENSP00000263621	CDS	0.005	2.58	41	DELETERIOUS						
rs137854449	Homo_sapiens/GRCh37.74	19	853338	G	A	V101M	ELANE	ENSG00000197561	ENST00000590230	ENSP00000466090	CDS	0.005	2.58	41	DELETERIOUS						
rs137854449	Homo_sapiens/GRCh37.74	19	853338	G	T	V101L	ELANE	ENSG00000197561	ENST00000263621	ENSP00000263621	CDS	0.026	2.58	41	DELETERIOUS						
rs137854449	Homo_sapiens/GRCh37.74	19	853338	G	T	V101L	ELANE	ENSG00000197561	ENST00000590230	ENSP00000466090	CDS	0.026	2.58	41	DELETERIOUS						
rs137854450	Homo_sapiens/GRCh37.74	19	855574	C	T	S126L	ELANE	ENSG00000197561	ENST00000263621	ENSP00000263621	CDS	0.291	2.56	41	TOLERATED						
rs137854450	Homo_sapiens/GRCh37.74	19	855574	C	T	S126L	ELANE	ENSG00000197561	ENST00000590230	ENSP00000466090	CDS	0.291	2.56	41	TOLERATED						
rs137854451	Homo_sapiens/GRCh37.74	19	856000	G	A	G214R	ELANE	ENSG00000197561	ENST00000263621	ENSP00000263621	CDS	0.002	2.6	37	DELETERIOUS						
rs137854451	Homo_sapiens/GRCh37.74	19	856000	G	A	G214R	ELANE	ENSG00000197561	ENST00000590230	ENSP00000466090	CDS	0.002	2.6	37	DELETERIOUS						
rs138211132	Homo_sapiens/GRCh37.74	19	856144	C	T	P262S	ELANE	ENSG00000197561	ENST00000263621	ENSP00000263621	CDS	0	3.35	8	DELETERIOUS	0.001	0	0	0.002	0	0
rs138211132	Homo_sapiens/GRCh37.74	19	856144	C	T	P262S	ELANE	ENSG00000197561	ENST00000590230	ENSP00000466090	CDS	0	3.35	8	DELETERIOUS	0.001	0	0	0.002	0	0
rs140642538	Homo_sapiens/GRCh37.74	19	855753	G	A	V186I	ELANE	ENSG00000197561	ENST00000263621	ENSP00000263621	CDS	0.421	2.63	40	TOLERATED						
rs140642538	Homo_sapiens/GRCh37.74	19	855753	G	A	V186I	ELANE	ENSG00000197561	ENST00000590230	ENSP00000466090	CDS	0.421	2.63	40	TOLERATED						
rs140880838	Homo_sapiens/GRCh37.74	19	855988	G	A	G210R	ELANE	ENSG00000197561	ENST00000263621	ENSP00000263621	CDS	0.019	2.6	37	DELETERIOUS						
rs140880838	Homo_sapiens/GRCh37.74	19	855988	G	A	G210R	ELANE	ENSG00000197561	ENST00000590230	ENSP00000466090	CDS	0.019	2.6	37	DELETERIOUS						
rs142441575	Homo_sapiens/GRCh37.74	19	855628	G	A	R144H	ELANE	ENSG00000197561	ENST00000263621	ENSP00000263621	CDS	0.125	2.56	41	TOLERATED	0	0.001	0	0	0	0
rs142441575	Homo_sapiens/GRCh37.74	19	855628	G	A	R144H	ELANE	ENSG00000197561	ENST00000590230	ENSP00000466090	CDS	0.125	2.56	41	TOLERATED	0	0.001	0	0	0	0
rs143579306	Homo_sapiens/GRCh37.74	19	856138	C	A	P260T	ELANE	ENSG00000197561	ENST00000263621	ENSP00000263621	CDS	0.483	3.34	11	TOLERATED						
rs143579306	Homo_sapiens/GRCh37.74	19	856138	C	A	P260T	ELANE	ENSG00000197561	ENST00000590230	ENSP00000466090	CDS	0.483	3.34	11	TOLERATED						
rs144441259	Homo_sapiens/GRCh37.74	19	855593	C	T	N132N	ELANE	ENSG00000197561	ENST00000263621	ENSP00000263621	CDS	0.787	2.56	41	TOLERATED	0.001	0.003	0	0	0	0
rs144441259	Homo_sapiens/GRCh37.74	19	855593	C	T	N132N	ELANE	ENSG00000197561	ENST00000590230	ENSP00000466090	CDS	0.787	2.56	41	TOLERATED	0.001	0.003	0	0	0	0
rs145175658	Homo_sapiens/GRCh37.74	19	855604	C	T	A136V	ELANE	ENSG00000197561	ENST00000263621	ENSP00000263621	CDS	1	2.61	38	TOLERATED						
rs145175658	Homo_sapiens/GRCh37.74	19	855604	C	T	A136V	ELANE	ENSG00000197561	ENST00000590230	ENSP00000466090	CDS	1	2.61	38	TOLERATED						
rs148492780	Homo_sapiens/GRCh37.74	19	856014	C	T	F218F	ELANE	ENSG00000197561	ENST00000263621	ENSP00000263621	CDS	1	2.6	37	TOLERATED	0.001	0.006	0	0	0	0
rs148492780	Homo_sapiens/GRCh37.74	19	856014	C	T	F218F	ELANE	ENSG00000197561	ENST00000590230	ENSP00000466090	CDS	1	2.6	37	TOLERATED	0.001	0.006	0	0	0	0
rs148726761	Homo_sapiens/GRCh37.74	19	855627	C	T	R144C	ELANE	ENSG00000197561	ENST00000263621	ENSP00000263621	CDS	0.055	2.56	41	TOLERATED						
rs148726761	Homo_sapiens/GRCh37.74	19	855627	C	T	R144C	ELANE	ENSG00000197561	ENST00000590230	ENSP00000466090	CDS	0.055	2.56	41	TOLERATED						
rs193141883	Homo_sapiens/GRCh37.74	19	855721	C	T	T175M	ELANE	ENSG00000197561	ENST00000263621	ENSP00000263621	CDS	0.008	2.57	41	DELETERIOUS	0	0	0.001	0	0	0
rs193141883	Homo_sapiens/GRCh37.74	19	855721	C	T	T175M	ELANE	ENSG00000197561	ENST00000590230	ENSP00000466090	CDS	0.008	2.57	41	DELETERIOUS	0	0	0.001	0	0	0
rs199558534	Homo_sapiens/GRCh37.74	19	855624	C	T	R143C	ELANE	ENSG00000197561	ENST00000263621	ENSP00000263621	CDS	0.048	2.56	41	DELETERIOUS						
rs199558534	Homo_sapiens/GRCh37.74	19	855624	C	T	R143C	ELANE	ENSG00000197561	ENST00000590230	ENSP00000466090	CDS	0.048	2.56	41	DELETERIOUS						
rs199659114	Homo_sapiens/GRCh37.74	19	855775	G	A	R193Q	ELANE	ENSG00000197561	ENST00000263621	ENSP00000263621	CDS	0.141	2.57	41	TOLERATED						
rs199659114	Homo_sapiens/GRCh37.74	19	855775	G	A	R193Q	ELANE	ENSG00000197561	ENST00000590230	ENSP00000466090	CDS	0.141	2.57	41	TOLERATED						
rs200384291	Homo_sapiens/GRCh37.74	19	856012	T	C	F218L	ELANE	ENSG00000197561	ENST00000263621	ENSP00000263621	CDS	0.011	2.6	37	DELETERIOUS						
rs200384291	Homo_sapiens/GRCh37.74	19	856012	T	C	F218L	ELANE	ENSG00000197561	ENST00000590230	ENSP00000466090	CDS	0.011	2.6	37	DELETERIOUS						
rs200592180	Homo_sapiens/GRCh37.74	19	855762	C	A	L189I	ELANE	ENSG00000197561	ENST00000263621	ENSP00000263621	CDS	0.392	2.57	41	TOLERATED						
rs200592180	Homo_sapiens/GRCh37.74	19	855762	C	A	L189I	ELANE	ENSG00000197561	ENST00000590230	ENSP00000466090	CDS	0.392	2.57	41	TOLERATED						
rs200595736	Homo_sapiens/GRCh37.74	19	855569	C	T	N124N	ELANE	ENSG00000197561	ENST00000263621	ENSP00000263621	CDS	1	2.56	41	TOLERATED						
rs200595736	Homo_sapiens/GRCh37.74	19	855569	C	T	N124N	ELANE	ENSG00000197561	ENST00000590230	ENSP00000466090	CDS	1	2.56	41	TOLERATED						
rs200993994	Homo_sapiens/GRCh37.74	19	855625	G	A	R143H	ELANE	ENSG00000197561	ENST00000263621	ENSP00000263621	CDS	0.109	2.56	41	TOLERATED						
rs200993994	Homo_sapiens/GRCh37.74	19	855625	G	A	R143H	ELANE	ENSG00000197561	ENST00000590230	ENSP00000466090	CDS	0.109	2.56	41	TOLERATED						
rs201139487	Homo_sapiens/GRCh37.74	19	855967	G	A	G203S	ELANE	ENSG00000197561	ENST00000263621	ENSP00000263621	CDS	0	2.6	37	DELETERIOUS						
rs201139487	Homo_sapiens/GRCh37.74	19	855967	G	A	G203S	ELANE	ENSG00000197561	ENST00000590230	ENSP00000466090	CDS	0	2.6	37	DELETERIOUS						
rs201224216	Homo_sapiens/GRCh37.74	19	856106	C	T	S249F	ELANE	ENSG00000197561	ENST00000263621	ENSP00000263621	CDS	0.689	2.95	27	TOLERATED	0	0	0	0	0	0.001
rs201224216	Homo_sapiens/GRCh37.74	19	856106	C	T	S249F	ELANE	ENSG00000197561	ENST00000590230	ENSP00000466090	CDS	0.689	2.95	27	TOLERATED	0	0	0	0	0	0.001
rs201313263	Homo_sapiens/GRCh37.74	19	855699	G	A	V168I	ELANE	ENSG00000197561	ENST00000263621	ENSP00000263621	CDS	0.396	2.57	42	TOLERATED						
rs201313263	Homo_sapiens/GRCh37.74	19	855699	G	A	V168I	ELANE	ENSG00000197561	ENST00000590230	ENSP00000466090	CDS	0.396	2.57	42	TOLERATED						
rs201326533	Homo_sapiens/GRCh37.74	19	855997	C	T	H213Y	ELANE	ENSG00000197561	ENST00000263621	ENSP00000263621	CDS	0.45	2.6	37	TOLERATED						
rs201326533	Homo_sapiens/GRCh37.74	19	855997	C	T	H213Y	ELANE	ENSG00000197561	ENST00000590230	ENSP00000466090	CDS	0.45	2.6	37	TOLERATED						
rs201421847	Homo_sapiens/GRCh37.74	19	853025	G	A	A73T	ELANE	ENSG00000197561	ENST00000263621	ENSP00000263621	CDS	0.493	2.57	40	TOLERATED	0	0	0	0	0.001	0
rs201421847	Homo_sapiens/GRCh37.74	19	853025	G	A	A73T	ELANE	ENSG00000197561	ENST00000590230	ENSP00000466090	CDS	0.493	2.57	40	TOLERATED	0	0	0	0	0.001	0
rs201664319	Homo_sapiens/GRCh37.74	19	855987	C	G	N209K	ELANE	ENSG00000197561	ENST00000263621	ENSP00000263621	CDS	0.03	2.6	37	DELETERIOUS						
rs201664319	Homo_sapiens/GRCh37.74	19	855987	C	G	N209K	ELANE	ENSG00000197561	ENST00000590230	ENSP00000466090	CDS	0.03	2.6	37	DELETERIOUS						
rs201664319	Homo_sapiens/GRCh37.74	19	855987	C	T	N209N	ELANE	ENSG00000197561	ENST00000263621	ENSP00000263621	CDS	1	2.6	37	TOLERATED	0	0	0	0.001	0	0
rs201664319	Homo_sapiens/GRCh37.74	19	855987	C	T	N209N	ELANE	ENSG00000197561	ENST00000590230	ENSP00000466090	CDS	1	2.6	37	TOLERATED	0	0	0	0.001	0	0
rs201961347	Homo_sapiens/GRCh37.74	19	852351	C	G	A8G	ELANE	ENSG00000197561	ENST00000263621	ENSP00000263621	CDS	0.381	3.1	13	TOLERATED						
rs201961347	Homo_sapiens/GRCh37.74	19	852351	C	G	A8G	ELANE	ENSG00000197561	ENST00000590230	ENSP00000466090	CDS	0.381	3.1	13	TOLERATED						
rs202069727	Homo_sapiens/GRCh37.74	19	855708	G	A	E171K	ELANE	ENSG00000197561	ENST00000263621	ENSP00000263621	CDS	0.251	2.57	41	TOLERATED						
rs202069727	Homo_sapiens/GRCh37.74	19	855708	G	A	E171K	ELANE	ENSG00000197561	ENST00000590230	ENSP00000466090	CDS	0.251	2.57	41	TOLERATED						
rs267606781	Homo_sapiens/GRCh37.74	19	853329	G	T	V98L	ELANE	ENSG00000197561	ENST00000263621	ENSP00000263621	CDS	0.573	2.58	41	TOLERATED						
rs267606781	Homo_sapiens/GRCh37.74	19	853329	G	T	V98L	ELANE	ENSG00000197561	ENST00000590230	ENSP00000466090	CDS	0.573	2.58	41	TOLERATED						
rs367663236	Homo_sapiens/GRCh37.74	19	855765	G	A	V190M	ELANE	ENSG00000197561	ENST00000263621	ENSP00000263621	CDS	0.047	2.57	41	DELETERIOUS						
rs367663236	Homo_sapiens/GRCh37.74	19	855765	G	A	V190M	ELANE	ENSG00000197561	ENST00000590230	ENSP00000466090	CDS	0.047	2.57	41	DELETERIOUS						
rs367677280	Homo_sapiens/GRCh37.74	19	852878	A	C	T24P	ELANE	ENSG00000197561	ENST00000263621	ENSP00000263621	CDS	0.476	3.04	27	TOLERATED						
rs367677280	Homo_sapiens/GRCh37.74	19	852878	A	C	T24P	ELANE	ENSG00000197561	ENST00000590230	ENSP00000466090	CDS	0.476	3.04	27	TOLERATED						
rs377698556	Homo_sapiens/GRCh37.74	19	855570	G	A	G125R	ELANE	ENSG00000197561	ENST00000263621	ENSP00000263621	CDS	0.811	2.56	41	TOLERATED						
rs377698556	Homo_sapiens/GRCh37.74	19	855570	G	A	G125R	ELANE	ENSG00000197561	ENST00000590230	ENSP00000466090	CDS	0.811	2.56	41	TOLERATED						
rs387906553	Homo_sapiens/GRCh37.74	19	853022	G	A	V72M	ELANE	ENSG00000197561	ENST00000263621	ENSP00000263621	CDS	0.273	2.57	40	TOLERATED						
rs387906553	Homo_sapiens/GRCh37.74	19	853022	G	A	V72M	ELANE	ENSG00000197561	ENST00000590230	ENSP00000466090	CDS	0.273	2.57	40	TOLERATED						
rs143634717	Homo_sapiens/GRCh37.74	19	853296	C	T	H87Y	ELANE	ENSG00000197561	ENST00000263621	ENSP00000263621	CDS	0.098	2.58	41	TOLERATED						
rs143634717	Homo_sapiens/GRCh37.74	19	853296	C	T	H87Y	ELANE	ENSG00000197561	ENST00000590230	ENSP00000466090	CDS	0.098	2.58	41	TOLERATED						
rs146878885	Homo_sapiens/GRCh37.74	19	855638	C	T	N147N	ELANE	ENSG00000197561	ENST00000263621	ENSP00000263621	CDS	0.506	2.56	41	TOLERATED	0.001	0.001	0	0.003	0	0
rs146878885	Homo_sapiens/GRCh37.74	19	855638	C	T	N147N	ELANE	ENSG00000197561	ENST00000590230	ENSP00000466090	CDS	0.506	2.56	41	TOLERATED	0.001	0.001	0	0.003	0	0
rs199532353	Homo_sapiens/GRCh37.74	19	855999	C	A	H213Q	ELANE	ENSG00000197561	ENST00000263621	ENSP00000263621	CDS	0.935	2.6	37	TOLERATED						
rs199532353	Homo_sapiens/GRCh37.74	19	855999	C	A	H213Q	ELANE	ENSG00000197561	ENST00000590230	ENSP00000466090	CDS	0.935	2.6	37	TOLERATED						
rs199536550	Homo_sapiens/GRCh37.74	19	853029	A	C	N74T	ELANE	ENSG00000197561	ENST00000263621	ENSP00000263621	CDS	0.417	2.57	40	TOLERATED						
rs199536550	Homo_sapiens/GRCh37.74	19	853029	A	C	N74T	ELANE	ENSG00000197561	ENST00000590230	ENSP00000466090	CDS	0.417	2.57	40	TOLERATED						
rs199645871	Homo_sapiens/GRCh37.74	19	855759	A	G	T188A	ELANE	ENSG00000197561	ENST00000263621	ENSP00000263621	CDS	0.153	2.57	41	TOLERATED						
rs199645871	Homo_sapiens/GRCh37.74	19	855759	A	G	T188A	ELANE	ENSG00000197561	ENST00000590230	ENSP00000466090	CDS	0.153	2.57	41	TOLERATED						
rs199891906	Homo_sapiens/GRCh37.74	19	855694	C	T	A166V	ELANE	ENSG00000197561	ENST00000263621	ENSP00000263621	CDS	0.023	2.63	41	DELETERIOUS						
rs199891906	Homo_sapiens/GRCh37.74	19	855694	C	T	A166V	ELANE	ENSG00000197561	ENST00000590230	ENSP00000466090	CDS	0.023	2.63	41	DELETERIOUS						
rs199929892	Homo_sapiens/GRCh37.74	19	856100	A	T	Q247L	ELANE	ENSG00000197561	ENST00000263621	ENSP00000263621	CDS	0.122	2.67	31	TOLERATED						
rs199929892	Homo_sapiens/GRCh37.74	19	856100	A	T	Q247L	ELANE	ENSG00000197561	ENST00000590230	ENSP00000466090	CDS	0.122	2.67	31	TOLERATED						
rs199932636	Homo_sapiens/GRCh37.74	19	856128	C	T	H256H	ELANE	ENSG00000197561	ENST00000263621	ENSP00000263621	CDS	0.843	3.28	12	TOLERATED						
rs199932636	Homo_sapiens/GRCh37.74	19	856128	C	T	H256H	ELANE	ENSG00000197561	ENST00000590230	ENSP00000466090	CDS	0.843	3.28	12	TOLERATED						
rs200449787	Homo_sapiens/GRCh37.74	19	855742	G	A	R182H	ELANE	ENSG00000197561	ENST00000263621	ENSP00000263621	CDS	0.015	2.57	41	DELETERIOUS	0	0	0.001	0	0	0
rs200449787	Homo_sapiens/GRCh37.74	19	855742	G	A	R182H	ELANE	ENSG00000197561	ENST00000590230	ENSP00000466090	CDS	0.015	2.57	41	DELETERIOUS	0	0	0.001	0	0	0
rs200627242	Homo_sapiens/GRCh37.74	19	853334	C	G	F99L	ELANE	ENSG00000197561	ENST00000263621	ENSP00000263621	CDS	0.224	2.58	41	TOLERATED	0	0	0	0.001	0	0
rs200627242	Homo_sapiens/GRCh37.74	19	853334	C	G	F99L	ELANE	ENSG00000197561	ENST00000590230	ENSP00000466090	CDS	0.224	2.58	41	TOLERATED	0	0	0	0.001	0	0
rs200923638	Homo_sapiens/GRCh37.74	19	855692	C	T	I165I	ELANE	ENSG00000197561	ENST00000263621	ENSP00000263621	CDS	0.56	2.63	41	TOLERATED						
rs200923638	Homo_sapiens/GRCh37.74	19	855692	C	T	I165I	ELANE	ENSG00000197561	ENST00000590230	ENSP00000466090	CDS	0.56	2.63	41	TOLERATED						
rs200998348	Homo_sapiens/GRCh37.74	19	853031	G	A	V75I	ELANE	ENSG00000197561	ENST00000263621	ENSP00000263621	CDS	0.408	2.58	38	TOLERATED						
rs200998348	Homo_sapiens/GRCh37.74	19	853031	G	A	V75I	ELANE	ENSG00000197561	ENST00000590230	ENSP00000466090	CDS	0.408	2.58	38	TOLERATED						
rs201110958	Homo_sapiens/GRCh37.74	19	856006	G	A	A216T	ELANE	ENSG00000197561	ENST00000263621	ENSP00000263621	CDS	0.634	2.6	37	TOLERATED	0	0.001	0	0	0	0
rs201110958	Homo_sapiens/GRCh37.74	19	856006	G	A	A216T	ELANE	ENSG00000197561	ENST00000590230	ENSP00000466090	CDS	0.634	2.6	37	TOLERATED	0	0.001	0	0	0	0
rs201163886	Homo_sapiens/GRCh37.74	19	852908	C	T	R34W	ELANE	ENSG00000197561	ENST00000263621	ENSP00000263621	CDS	0.002	2.57	38	DELETERIOUS						
rs201163886	Homo_sapiens/GRCh37.74	19	852908	C	T	R34W	ELANE	ENSG00000197561	ENST00000590230	ENSP00000466090	CDS	0.002	2.57	38	DELETERIOUS						
rs201723157	Homo_sapiens/GRCh37.74	19	855774	C	T	R193W	ELANE	ENSG00000197561	ENST00000263621	ENSP00000263621	CDS	0.006	2.57	41	DELETERIOUS						
rs201723157	Homo_sapiens/GRCh37.74	19	855774	C	T	R193W	ELANE	ENSG00000197561	ENST00000590230	ENSP00000466090	CDS	0.006	2.57	41	DELETERIOUS						
rs201729066	Homo_sapiens/GRCh37.74	19	855588	G	T	A131S	ELANE	ENSG00000197561	ENST00000263621	ENSP00000263621	CDS	0.89	2.56	41	TOLERATED						
rs201729066	Homo_sapiens/GRCh37.74	19	855588	G	T	A131S	ELANE	ENSG00000197561	ENST00000590230	ENSP00000466090	CDS	0.89	2.56	41	TOLERATED						
rs201788817	Homo_sapiens/GRCh37.74	19	855693	G	A	A166T	ELANE	ENSG00000197561	ENST00000263621	ENSP00000263621	CDS	0.033	2.63	41	DELETERIOUS						
rs201788817	Homo_sapiens/GRCh37.74	19	855693	G	A	A166T	ELANE	ENSG00000197561	ENST00000590230	ENSP00000466090	CDS	0.033	2.63	41	DELETERIOUS						
rs201882944	Homo_sapiens/GRCh37.74	19	853273	C	T	A79V	ELANE	ENSG00000197561	ENST00000263621	ENSP00000263621	CDS	0.476	2.75	35	TOLERATED						
rs201882944	Homo_sapiens/GRCh37.74	19	853273	C	T	A79V	ELANE	ENSG00000197561	ENST00000590230	ENSP00000466090	CDS	0.476	2.75	35	TOLERATED						
rs201977478	Homo_sapiens/GRCh37.74	19	855735	C	G	L180V	ELANE	ENSG00000197561	ENST00000263621	ENSP00000263621	CDS	0.448	2.57	41	TOLERATED						
rs201977478	Homo_sapiens/GRCh37.74	19	855735	C	G	L180V	ELANE	ENSG00000197561	ENST00000590230	ENSP00000466090	CDS	0.448	2.57	41	TOLERATED						
rs202234596	Homo_sapiens/GRCh37.74	19	856133	G	A	R258Q	ELANE	ENSG00000197561	ENST00000263621	ENSP00000263621	CDS	0.448	3.28	12	TOLERATED						
rs202234596	Homo_sapiens/GRCh37.74	19	856133	G	A	R258Q	ELANE	ENSG00000197561	ENST00000590230	ENSP00000466090	CDS	0.448	3.28	12	TOLERATED						
rs369606303	Homo_sapiens/GRCh37.74	19	853371	G	A	V112I	ELANE	ENSG00000197561	ENST00000263621	ENSP00000263621	CDS	0.198	2.64	40	TOLERATED						
rs369606303	Homo_sapiens/GRCh37.74	19	853371	G	A	V112I	ELANE	ENSG00000197561	ENST00000590230	ENSP00000466090	CDS	0.198	2.64	40	TOLERATED						
rs373765150	Homo_sapiens/GRCh37.74	19	856139	C	G	P260R	ELANE	ENSG00000197561	ENST00000263621	ENSP00000263621	CDS	0.168	3.34	11	TOLERATED						
rs373765150	Homo_sapiens/GRCh37.74	19	856139	C	G	P260R	ELANE	ENSG00000197561	ENST00000590230	ENSP00000466090	CDS	0.168	3.34	11	TOLERATED						
rs375350474	Homo_sapiens/GRCh37.74	19	852912	G	A	R35Q	ELANE	ENSG00000197561	ENST00000263621	ENSP00000263621	CDS	0.244	2.57	38	TOLERATED						
rs375350474	Homo_sapiens/GRCh37.74	19	852912	G	A	R35Q	ELANE	ENSG00000197561	ENST00000590230	ENSP00000466090	CDS	0.244	2.57	38	TOLERATED						
rs535990034 Not found
rs538255080 Not found
rs538571617 Not found
rs549887145 Not found
rs568474579 Not found
rs569608929 Not found
rs745455816 Not found
rs747053501 Not found
rs749675557 Not found
rs752022665 Not found
rs753965718 Not found
rs754277797 Not found
rs755088297 Not found
rs756112245 Not found
rs756726256 Not found
rs759382746 Not found
rs759486889 Not found
rs759734732 Not found
rs760080772 Not found
rs760263661 Not found
rs760393415 Not found
rs761153954 Not found
rs769123461 Not found
rs771710628 Not found
rs773460580 Not found
rs773808780 Not found
rs774457980 Not found
rs774508567 Not found
rs777652186 Not found
rs781705775 Not found
rs878855314 Not found
rs878855315 Not found
rs878855316 Not found
rs878855319 Not found
rs878855320 Not found
rs878855321 Not found
rs886038502 Not found
rs890280050 Not found
rs899133377 Not found
rs1004780968 Not found
rs1050778419 Not found
rs1057520110 Not found
rs1064793108 Not found
rs1085307624 Not found
rs1085307717 Not found
rs1131691520 Not found
rs1131691882 Not found
rs1131691914 Not found
rs1196145112 Not found
rs1221333968 Not found
rs1226645940 Not found
rs1238175738 Not found
rs1405536870 Not found
rs1471191879 Not found
rs1477643766 Not found
rs1555709342 Not found
rs1555709360 Not found
rs1555709367 Not found
rs1555710077 Not found
rs1555710089 Not found
rs1555710104 Not found
rs1568304522 Not found
rs1568306204 Not found
rs1599290793 Not found
rs1599291445 Not found
rs1599291639 Not found
rs1599294094 Not found
rs2035606369 Not found
rs2035607298 Not found
rs2035615592 Not found
rs2035616857 Not found
rs2035617210 Not found
rs2035617899 Not found
rs2035663521 Not found
rs2035666353 Not found
rs2035674370 Not found
rs2035677886 Not found
rs587780935 Not found
rs587780936 Not found
rs28929493 Not found
rs28929494 Not found
rs545418743 Not found
rs554734221 Not found
rs563563792 Not found
rs745363993 Not found
rs746799175 Not found
rs747108397 Not found
rs747904347 Not found
rs747957936 Not found
rs748345928 Not found
rs749122664 Not found
rs750859137 Not found
rs751029091 Not found
rs751761755 Not found
rs752760119 Not found
rs754547435 Not found
rs754743618 Not found
rs754914572 Not found
rs756658547 Not found
rs757595099 Not found
rs758686182 Not found
rs762222988 Not found
rs762470485 Not found
rs763679969 Not found
rs764500411 Not found
rs764691548 Not found
rs765260900 Not found
rs766413616 Not found
rs766583570 Not found
rs766647358 Not found
rs767208047 Not found
rs767887706 Not found
rs768465551 Not found
rs769821271 Not found
rs770152261 Not found
rs770660263 Not found
rs771000673 Not found
rs771759665 Not found
rs772801344 Not found
rs772803050 Not found
rs773617543 Not found
rs773852151 Not found
rs774270504 Not found
rs776922618 Not found
rs777407712 Not found
rs778138591 Not found
rs778800388 Not found
rs779008936 Not found
rs780046041 Not found
rs780905514 Not found
rs781530030 Not found
rs868340894 Not found
rs912319871 Not found
rs942026381 Not found
rs986515965 Not found
rs1008048630 Not found
rs1011099435 Not found
rs1048355118 Not found
rs1064795415 Not found
rs1166515469 Not found
rs1181023169 Not found
rs1198272306 Not found
rs1201600992 Not found
rs1203486323 Not found
rs1207078633 Not found
rs1222918340 Not found
rs1241990890 Not found
rs1243076107 Not found
rs1243323783 Not found
rs1244665351 Not found
rs1254629520 Not found
rs1265303415 Not found
rs1279639938 Not found
rs1280062009 Not found
rs1283357466 Not found
rs1285134340 Not found
rs1288473812 Not found
rs1304833868 Not found
rs1306662429 Not found
rs1309647401 Not found
rs1309906515 Not found
rs1320267189 Not found
rs1322402865 Not found
rs1322572531 Not found
rs1322683917 Not found
rs1325418139 Not found
rs1334003023 Not found
rs1334071792 Not found
rs1335324429 Not found
rs1336866933 Not found
rs1346429116 Not found
rs1353735959 Not found
rs1358228639 Not found
rs1358943684 Not found
rs1359554932 Not found
rs1360344559 Not found
rs1371370731 Not found
rs1378830851 Not found
rs1379021612 Not found
rs1380068567 Not found
rs1382122842 Not found
rs1386755655 Not found
rs1389569258 Not found
rs1396230082 Not found
rs1402628228 Not found
rs1405779652 Not found
rs1408272130 Not found
rs1417841099 Not found
rs1424171480 Not found
rs1424691242 Not found
rs1426835979 Not found
rs1429051935 Not found
rs1431718674 Not found
rs1431789708 Not found
rs1462018767 Not found
rs1466840847 Not found
rs1470187339 Not found
rs1470556302 Not found
rs1470888380 Not found
rs1481000746 Not found
rs1489838508 Not found
rs1568303621 Not found
rs1568304154 Not found
rs1568306169 Not found
rs1599290674 Not found
rs1849521721 Not found
rs2035608108 Not found
rs2035615488 Not found
rs2035615523 Not found
rs2035617858 Not found
rs2035618392 Not found
rs2035626466 Not found
rs2035627103 Not found
rs2035627465 Not found
rs2035664153 Not found
rs2035664443 Not found
rs2035665078 Not found
rs2035666813 Not found
rs2035667799 Not found
rs2035667999 Not found
rs2035668478 Not found
rs2035669409 Not found
rs2035674003 Not found
rs2035674407 Not found
rs2035675976 Not found
rs2035676991 Not found
rs2035677390 Not found
rs2035677590 Not found
rs2035677921 Not found
rs2035678116 Not found
rs2035678845 Not found
rs2035679193 Not found
rs2035679241 Not found
rs2035679316 Not found
Low confidence means that the protein alignment does not have enough sequence diversity. Because the position artifically appears to be conserved, an amino acid may incorrectly predicted to be damaging.
Population allele frequencies are from the 1000 Genomes Phase 3 data.
